# Supplementary material for: Detection of Promoter DNA Methylation in Urine and Plasma Aids the Detection of Non–Small Cell Lung Cancer
Source: Oxford University Press journal article supplement (doi:10.1158/1078-0432.ccr-19-2896), 2020-05-19
Supplement: 10780432ccr192896-sup-228010_3_supp_6286076_qx1hp2.docx [file 10780432ccr192896-sup-228010_3_supp_6286076_qx1hp2.docx]

### Supplementary Table S3 Correlation of Δ*C*t methylation between Plasma and Urine

| **All (n=96)** | **Simultaneously methylated both in plasma and urine (Positive concordance)** | **Simultaneously NON methylated both in plasma and urine**  **(Negative concordance)** | **Sum positive concordance and negative concordance** | **Pearson correlation coefficient (r)** | **95% CI** | **p value** |
| --- | --- | --- | --- | --- | --- | --- |
| *CDO1* | 46 (48%) | 16 (17%) | 62 (65%) | -0.02 | -0.22-0.18 | 0.819 |
| *TAC1* | 41 (43%) | 13 (14%) | 54 (56%) | 0.34 | 0.15-0.50 | <0.001 |
| *HOXA7* | 36 (38%) | 28 (29%) | 64 (67%) | 0.55 | 0.40-0.68 | <0.001 |
| *HOXA9* | 21 (22%) | 30 (31%) | 51 (53%) | 0.11 | -0.09-0.31 | 0.268 |
| *SOX17* | 50 (52%) | 16 (17%) | 66 (69%) | 0.20 | 0.01-0.39 | 0.045 |
| *ZFP42* | 77 (80%) | 5 (5%) | 82 (85%) | -0.04 | -0.24-0.16 | 0.713 |
|  |  |  |  |  |  |  |
| **Cancer (n=71)** | **Simultaneously methylated both in plasma and urine (Positive concordance)** | **Simultaneously NON methylated both in plasma and urine**  **(Negative concordance)** | **Sum positive concordance and negative concordance** | **Pearson correlation coefficient (r)** | **95% CI** | **p value** |
| *CDO1* | 42 (59%) | 7 (10%) | 49 (69%) | -0.029 | -0.26-0.21 | 0.811 |
| *TAC1* | 39 (55%) | 2 (2%) | 41 (58%) | 0.33 | 0.11-0.52 | 0.005 |
| *HOXA7* | 32 (45%) | 15 (21%) | 47 (66%) | 0.55 | 0.37-0.70 | <0.001 |
| *HOXA9* | 20 (28%) | 14 (20%) | 34 (48%) | 0.10 | -0.14-0.33 | 0.409 |
| *SOX17* | 47 (66%) | 5 (7%) | 52 (73%) | 0.35 | 0.12-0.54 | 0.003 |
| *ZFP42* | 60 (85%) | 0 (0%) | 60 (85%) | -0.05 | -0.28-0.19 | 0.681 |
|  |  |  |  |  |  |  |
| **Controls (n=25)** | **Simultaneously methylated both in plasma and urine (Positive concordance)** | **Simultaneously NON methylated both in plasma and urine**  **(Negative concordance)** | **Sum positive concordance and negative concordance** | **Pearson correlation coefficient (r)** | **95% CI** | **p value** |
| *CDO1* | 4 (16%) | 9 (36%) | 13 (52%) | -0.07 | -0.45-0.34 | 0.75 |
| *TAC1* | 2 (8%) | 11 (44%) | 13 (52%) | 0.67 | 0.37-0.84 | <0.001 |
| *HOXA7* | 4 (16%) | 13 (52%) | 17 (68%) | 0.59 | 0.26-0.80 | 0.002 |
| *HOXA9* | 1 (4%) | 16 (64%) | 17 (68%) | 0.71 | 0.43-0.86 | <0.001 |
| *SOX17* | 3 (12%) | 11 (44%) | 14 (56%) | -0.08 | -0.46-0.33 | 0.720 |
| *ZFP42* | 17 (68%) | 5 (20%) | 22 (88%) | 0.28 | -0.13-0.61 | 0.172 |

*Abbreviations*: Confidence interval: CI
