# Supplementary material for: Detection of Promoter DNA Methylation in Urine and Plasma Aids the Detection of Non–Small Cell Lung Cancer
Source: Oxford University Press journal article supplement (doi:10.1158/1078-0432.ccr-19-2896), 2020-05-19
Supplement: 10780432ccr192896-sup-228010_3_supp_6286077_qs1hp2.docx [file 10780432ccr192896-sup-228010_3_supp_6286077_qs1hp2.docx]

### Supplementary Table S4. Gene Methylation Detection, Sensitivity, Specificity Using Detectable vs. Non-detectable cutoff in NSCLC early stages

|  | **Cancer (n=48)** | | **Control (n=25)** | | |  | |  | |  |  |
| --- | --- | --- | --- | --- | --- | --- | --- | --- | --- | --- | --- |
| **Plasma** | **n** | **Sensitivity** | | **n** | **Specificity** | **PPV** | | **NPV** | | **AUC** | **95% CI** |
| CDO1 | 35 | 73% | | 11 | 56% | 76% | | 52% | | 0.67 | 0.53-0.80 |
| TAC1 | 37 | 77% | | 10 | 60% | 79% | | 58% | | 0.71 | 0.57-0.84 |
| HOXA7 | 30 | 63% | | 4 | 84% | 88% | | 54% | | 0.73 | 0.60-0.85 |
| HOXA9 | 26 | 54% | | 5 | 80% | 84% | | 48% | | 0.64 | 0.51-0.77 |
| SOX17 | 36 | 75% | | 9 | 64% | 80% | | 57% | | 0.73 | 0.60-0.86 |
| ZFP42 | 44 | 92% | | 18 | 28% | 71% | | 64% | | 0.70 | 0.58-0.83 |
| All (at least 3 positive) | 39 | 81% | | 10 | 60% | 80% | | 63% | | 0.64 | 0.51-0.78 |
|  |  |  | |  |  |  | |  | |  |  |
|  | **Cancer (n=47)** | | **Control (n=27)** | | |  | |  | |  |  |
| **Urine** | **n** | **Sensitivity** | | **n** | **Specificity** | | **PPV** | | **NPV** | **AUC** | **95% CI** |
| CDO1 | 30 | 64% | | 10 | 63% | | 75% | | 50% | 0.66 | 0.53-0.78 |
| TAC1 | 32 | 68% | | 7 | 74% | | 82% | | 57% | 0.74 | 0.60-0.87 |
| HOXA7 | 19 | 40% | | 12 | 56% | | 61% | | 35% | 0.49 | 0.34-0.64 |
| HOXA9 | 19 | 40% | | 5 | 81% | | 79% | | 44% | 0.66 | 0.53-0.79 |
| SOX17 | 36 | 77% | | 9 | 67% | | 80% | | 62% | 0.74 | 0.62-0.87 |
| ZFP42 | 43 | 91% | | 21 | 22% | | 67% | | 60% | 0.66 | 0.52-0.79 |
| All (at least 3 positive) | 43 | 91% | | 19 | 30% | | 69% | | 67% | 0.60 | 0.47-0.74 |
|  |  |  | |  |  | |  | |  |  |  |
|  | **Cancer (n=47)** | | | **Control (n=25)** | |  | |  | |  |  |
| **Plasma and Urine** | **n** | **Sensitivity** | | **n** | **Specificity** | **PPV** | | **NPV** | | **AUC** | **95% CI** |
| CDO1 | 23 | 48% | | 4 | 85% | 85% | | 47% | | 0.67 | 0.54-0.81 |
| TAC1 | 24 | 50% | | 2 | 92% | 92% | | 50% | | 0.69 | 0.55-0.83 |
| HOXA7 | 16 | 34% | | 4 | 85% | 80% | | 43% | | 0.63 | 0.49-0.77 |
| HOXA9 | 11 | 23% | | 1 | 96% | 92% | | 41% | | 0.72 | 0.60-0.84 |
| SOX17 | 29 | 60% | | 3 | 88% | 91% | | 55% | | 0.76 | 0.63-0.88 |
| ZFP42 | 39 | 83% | | 17 | 32% | 70% | | 50% | | 0.71 | 0.58-0.84 |
| All (at least 3 positive) | 30 | 64% | | 2 | 92% | 94% | | 58% | | 0.68 | 0.55-0.81 |

*Abbreviations*: Area under the curve: AUC; positive predictive value: PPV; negative predictive value: NPV.
