# Supplementary material for: Detection of Promoter DNA Methylation in Urine and Plasma Aids the Detection of Non–Small Cell Lung Cancer
Source: Oxford University Press journal article supplement (doi:10.1158/1078-0432.ccr-19-2896), 2020-05-19
Supplement: 10780432ccr192896-sup-228010_3_supp_6286079_q21hp2.docx [file 10780432ccr192896-sup-228010_3_supp_6286079_q21hp2.docx]

### Supplementary Table S6. Univariate and multivariate logistic regression analysis for risk of having NSCLC in Early Stages (n=75)

|  | ***Univariate analysis*** | | | ***Multivariate analysis*** | | |
| --- | --- | --- | --- | --- | --- | --- |
|  | **OR** | **95% CI** | ***p* Value** | **OR** | **95% CI** | ***p* Value** |
| CDO1 methylated in plasma | 3.42 | 1.26-9.70 | 0.017 | 3.79 | 1.20-12.88 | 0.026 |
| TAC1 methylated in plasma | 5.05 | 1.81-14.88 | 0.002 | 8.56 | 2.48-35.70 | 0.001 |
| HOXA7 methylated in plasma | 8.75 | 2.81-33.77 | <0.001 | 7.25 | 2.03-32.13 | 0.004 |
| HOXA9 methylated in plasma | 4.73 | 1.61-16.11 | 0.007 | 5.34 | 1.57-21.68 | 0.011 |
| SOX17 methylated in plasma | 5.33 | 1.92-15.80 | 0.002 | 5.00 | 1.58-17.42 | 0.008 |
| ZFP42 methylated in plasma | 4.28 | 1.15-18.07 | 0.034 | 2.97 | 0.65-14.70 | 0.163 |
| At least 3 genes methylated in plasma | 6.50 | 2.27-20.00 | <0.001 | 7.40 | 2.24-28.01 | 0.002 |
|  |  |  |  |  |  |  |
| CDO1 methylated in urine | 3.00 | 1.14-8.25 | 0.028 | 4.16 | 1.29-15.13 | 0.022 |
| TAC1 methylated in urine | 6.10 | 2.20-18.57 | <0.001 | 4.68 | 1.38-17.86 | 0.016 |
| HOXA7 methylated in urine | 0.85 | 0.32-2.23 | 0.736 | 0.57 | 0.17-1.89 | 0.366 |
| HOXA9 methylated in urine | 2.99 | 1.02-10.15 | 0.058 | 2.55 | 0.73-10.33 | 0.159 |
| SOX17 methylated in urine | 6.55 | 2.37-19.50 | <0.001 | 6.61 | 2.07-23.87 | 0.002 |
| ZFP42 methylated in urine | 3.07 | 0.79-13.14 | 0.108 | 2.05 | 0.42-10.61 | 0.374 |
| At least 3 genes methylated in urine | 4.53 | 1.27-18.71 | 0.025 | 3.26 | 0.77-15.33 | 0.115 |
|  |  |  |  |  |  |  |
| CDO1 Plasma and Urine | 5.06 | 1.64-19.30 | 0.008 | 6.43 | 1.64-33.64 | 0.014 |
| TAC1 Plasma and Urine | 12.00 | 3.09-79.96 | 0.002 | 12.85 | 2.50-128.95 | 0.008 |
| HOXA7 Plasma and Urine | 2.97 | 0.94-11.42 | 0.081 | 1.82 | 0.47-8.11 | 0.403 |
| HOXA9 Plasma and Urine | 7.73 | 1.37-145.63 | 0.057 | 5.22 | 0.78-104.99 | 0.146 |
| SOX17 Plasma and Urine | 11.70 | 3.47-54.33 | <0.001 | 11.78 | 3.03-64.64 | 0.001 |
| ZFP42 Plasma and Urine | 2.29 | 0.73-7.26 | 0.151 | 1.56 | 0.41-5.81 | 0.510 |
| At least 3 genes in Plasma and Urine | 20.29 | 5.16-136.53 | <0.001 | 31.95 | 5.86-359.87 | <0.001 |
|  |  |  |  |  |  |  |

*Abbreviations*: CI confidence Interval; OR Odds Ratio; NA non-applicable

Multivariate analysis adjusted by age, race and pack years
