# Supplementary material for: Detection of Promoter DNA Methylation in Urine and Plasma Aids the Detection of Non–Small Cell Lung Cancer
Source: Oxford University Press journal article supplement (doi:10.1158/1078-0432.ccr-19-2896), 2020-05-19
Supplement: 10780432ccr192896-sup-228010_3_supp_6286080_qb1hp2.docx [file 10780432ccr192896-sup-228010_3_supp_6286080_qb1hp2.docx]

### Supplementary Table S7. Univariate and multivariate logistic regression analysis for risk of having NSCLC in late stages (n=53)

|  | ***Univariate analysis*** | | | ***Multivariate analysis*** | | | |
| --- | --- | --- | --- | --- | --- | --- | --- |
|  | **OR** | **95% CI** | ***p* Value** | | **OR** | **95% CI** | ***p* Value** | |
| CDO1 methylated in plasma | 5.35 | 1.60-20.34 | 0.009 | | 6.68 | 1.68-3.44 | 0.011 | |
| TAC1 methylated in plasma | 18.00 | 4.12-128.72 | <0.001 | | 17.02 | 3.58-131.24 | 0.001 | |
| HOXA7 methylated in plasma | 131.25 | 19.72-2723.08 | <0.001 | | 299.69 | 26.47-16291.31 | <0.001 | |
| HOXA9 methylated in plasma | 7.56 | 2.25-29.36 | 0.002 | | 7.13 | 1.983-30.49 | 0.004 | |
| SOX17 methylated in plasma | 13.63 | 3.55-69.74 | <0.001 | | 13.31 | 3.08-79.50 | 0.001 | |
| ZFP42 methylated in plasma | 9.72 | 1.54-190.22 | 0.041 | | 15.83 | 2.01-345.80 | 0.022 | |
| At least 3 genes methylated in plasma | 30.92 | 5.46-526.91 | 0.009 | | 59.94 | 6.47-2818.80 | 0.007 | |
|  |  |  |  | |  |  |  | |
| CDO1 methylated in urine | 11.90 | 3.14-60.10 | 0.001 | | 49.92 | 7.32-1057.14 | 0.001 | |
| TAC1 methylated in urine | 5.71 | 1.78-20.33 | 0.005 | | 6.67 | 1.81-28.95 | 0.007 | |
| HOXA7 methylated in urine | 3.04 | 0.97-10.16 | 0.061 | | 3.35 | 0.95-13.12 | 0.068 | |
| HOXA9 methylated in urine | 7.33 | 2.1-28.60 | 0.002 | | 8.30 | 2.24-36.71 | 0.003 | |
| SOX17 methylated in urine | 10.00 | 2.83-42.99 | <0.001 | | 12.21 | 3.06-65.48 | 0.001 | |
| ZFP42 methylated in urine | 3.14 | 0.64-23.12 | 0.189 | | 5.08 | 0.90-44.98 | 0.089 | |
| At least 3 genes methylated in urine | 9.68 | 1.58-188.03 | 0.040 | | 15.68 | 2.14-406.19 | 0.025 | |
|  |  |  |  | |  |  |  | |
| CDO1 Plasma and Urine | 17.42 | 4.67-80.74 | <0.001 | | 57.07 | 9.256-689.48 | <0.001 | |
| TAC1 Plasma and Urine | 18.00 | 4.11-128.72 | 0.001 | | 21.19 | 4.24-175.29 | <0.001 | |
| HOXA7 Plasma and Urine | 11.50 | 3.20-50.47 | <0.001 | | 11.08 | 2.84-54.18 | 0.001 | |
| HOXA9 Plasma and Urine | 13.76 | 2.29-265.81 | 0.0171 | | 14.52 | 2.28-288.97 | 0.017 | |
| SOX17 Plasma and Urine | 23.00 | 5.68-125.41 | <0.001 | | 22.43 | 5.31-128.38 | <0.001 | |
| ZFP42 Plasma and Urine | 3.29 | 0.81-16.86 | 0.113 | | 4.75 | 0.98-29.78 | 0.067 | |
| At least 3 genes in Plasma and Urine | 126.50 | 20.87-1393.86 | <0.001 | | 148.84 | 4.15-227.68 | 0.014 | |
|  |  |  |  | |  |  |  | |

*Abbreviations*: CI confidence Interval; OR Odds Ratio; NA non-applicable

Multivariate analysis adjusted by age, race and pack years
