# Supplementary material for: Detection of Promoter DNA Methylation in Urine and Plasma Aids the Detection of Non–Small Cell Lung Cancer
Source: Oxford University Press journal article supplement (doi:10.1158/1078-0432.ccr-19-2896), 2020-05-19
Supplement: 10780432ccr192896-sup-228010_3_supp_6286081_qy1hp2.docx [file 10780432ccr192896-sup-228010_3_supp_6286081_qy1hp2.docx]

### Supplementary Table S8. Gene Methylation Detection, Sensitivity, Specificity Using Detectable vs. Non-detectable cutoff in whites

|  | **Cancer (n=41)** | | **Control (n=11)** | | |  | |  | |  |  |
| --- | --- | --- | --- | --- | --- | --- | --- | --- | --- | --- | --- |
| **Plasma** | **n** | **Sensitivity** | | **n** | **Specificity** | **PPV** | | **NPV** | | **AUC** | **95% CI** |
| CDO1 | 32 | 78% | | 4 | 64% | 89% | | 44% | | 0.68 | 0.49-0.88 |
| TAC1 | 32 | 78% | | 4 | 64% | 89% | | 44% | | 0.73 | 0.57-0.89 |
| HOXA7 | 29 | 71% | | 0 | 100% | 100% | | 48% | | 0.83 | 0.72-0.94 |
| HOXA9 | 25 | 61% | | 1 | 91% | 96% | | 38% | | 0.68 | 0.54-0.82 |
| SOX17 | 32 | 78% | | 5 | 55% | 86% | | 40% | | 0.62 | 0.43-0.82 |
| ZFP42 | 38 | 93% | | 11 | 0% | 78% | | 0% | | 0.69 | 0.54-0.83 |
| All (at least 3 positive) | 34 | 83% | | 4 | 64% | 89% | | 50% | | 0.64 | 0.47-0.81 |
|  |  |  | |  |  |  | |  | |  |  |
|  | **Cancer (n=41)** | | **Control (n=11)** | | |  | |  | |  |  |
| **Urine** | **n** | **Sensitivity** | | **n** | **Specificity** | | **PPV** | | **NPV** | **AUC** | **95% CI** |
| CDO1 | 28 | 68% | | 2 | 82% | | 93% | | 41% | 0.84 | 0.73-0.95 |
| TAC1 | 31 | 76% | | 1 | 91% | | 97% | | 97% | 0.88 | 0.79-0.97 |
| HOXA7 | 20 | 49% | | 3 | 73% | | 87% | | 0.63 |  | 0.44-0.81 |
| HOXA9 | 21 | 51% | | 1 | 91% | 95% | | | 33% | 0.71 | 0.56-0.86 |
| SOX17 | 31 | 76% | | 4 | 64% | 89% | | | 41% | 0.72 | 0.54-0.90 |
| ZFP42 | 38 | 93% | | 10 | 9% | 79% | | | 25% | 0.66 | 0.49-0.84 |
| All (at least 3 positive) | 39 | 95% | | 8 | 27% | 83% | | | 60% | 0.71 | 0.53-0.89 |
|  |  |  | |  |  |  | |  | |  |  |
|  | **Cancer (n=41)** | | | **Control (n=11)** | |  | |  | |  |  |
| **Plasma and Urine** | **n** | **Sensitivity** | | **n** | **Specificity** | **PPV** | | **NPV** | | **AUC** | **95% CI** |
| CDO1 | 22 | 54% | | 1 | 91% | 96% | | 34% | | 0.79 | 0.60-0.98 |
| TAC1 | 23 | 56% | | 0 | 100% | 100% | | 38% | | 0.85 | 0.72-0.98 |
| HOXA7 | 18 | 44% | | 0 | 100% | 100% | | 32% | | 0.79 | 0.65-0.93 |
| HOXA9 | 13 | 32% | | 0 | 100% | 100% | | 28% | | 0.84 | 0.73-0.96 |
| SOX17 | 24 | 59% | | 2 | 82% | 92% | | 35% | | 0.73 | 0.56-0.89 |
| ZFP42 | 35 | 85% | | 10 | 9% | 78% | | 14% | | 0.81 | 0.68-0.94 |
| All (at least 3 positive) | 28 | 68% | | 0 | 100% | 100% | | 46% | | 0.74 | 0.57-0.92 |

*Abbreviations*: Area under the curve: AUC; positive predictive value: PPV; negative predictive value: NPV.
