# Supplementary material for: Detection of Promoter DNA Methylation in Urine and Plasma Aids the Detection of Non–Small Cell Lung Cancer
Source: Oxford University Press journal article supplement (doi:10.1158/1078-0432.ccr-19-2896), 2020-05-19
Supplement: 10780432ccr192896-sup-228010_3_supp_6286083_qt1hp2.docx [file 10780432ccr192896-sup-228010_3_supp_6286083_qt1hp2.docx]

### Supplementary Table S10. Univariate and multivariate logistic regression analysis for risk of having NSCLC in Whites (n=52)

|  | ***Univariate analysis*** | | | ***Multivariate analysis*** | | |
| --- | --- | --- | --- | --- | --- | --- |
|  | **OR** | **95% CI** | ***p* Value** | **OR** | **95% CI** | ***p* Value** |
| CDO1 methylated in plasma | 6.22 | 1.54-28.65 | 0.013 | 6.20 | 1.23-39.11 | 0.033 |
| TAC1 methylated in plasma | 6.22 | 1.54-28.64 | 0.012 | 11.89 | 2.08-106.85 | 0.011 |
| HOXA7 methylated in plasma | 2.88 | 1.21- NA | 0.992 | 6.05 | 6.41-NA | 0.995 |
| HOXA9 methylated in plasma | 15.63 | 2.62- 301.00 | 0.012 | 22.30 | 2.68-611.57 | 0.017 |
| SOX17 methylated in plasma | 4.27 | 1.06-18.21 | 0.042 | 4.80 | 0.91-29.82 | 0.070 |
| ZFP42 methylated in plasma | 8.12 | NA-1.05 | 0.994 | 1.26 | NA-2.25 | 0.994 |
| At least 3 genes methylated in plasma | 8.50 | 2.04- 40.87 | 0.004 | 8.67 | 1.70-58.23 | 0.014 |
|  |  |  |  |  |  |  |
| CDO1 methylated in urine | 9.69 | 2.13-69.84 | 0.008 | 11.46 | 2.01-113.72 | 0.014 |
| TAC1 methylated in urine | 31.00 | 5.05-606.30 | 0.001 | 109.92 | 7.39-6298.33 | 0.005 |
| HOXA7 methylated in urine | 2.54 | 0.63-12.86 | 0.211 | 2.72 | 0.55-19.94 | 0.263 |
| HOXA9 methylated in urine | 10.50 | 1.77-201.74 | 0.032 | 10.95 | 1.53-237.11 | 0.043 |
| SOX17 methylated in urine | 5.43 | 1.36-24.62 | 0.020 | 5.94 | 1.19-38.964 | 0.040 |
| ZFP42 methylated in urine | 1.27 | 0.06 11.18 | 0.845 | 1.99 | 7.62-29.60 | 0.621 |
| At least 3 genes methylated in urine | 7.31 | 1.05- 62.94 | 0.045 | 8.67 | 1.02-98.05 | 0.054 |
|  |  |  |  |  |  |  |
| CDO1 Plasma and Urine | 11.58 | 1.95-222.54 | 0.025 | 9.88 | 1.42-207.37 | 0.049 |
| TAC1 Plasma and Urine | 1.92 | 3.99- NA | 0.993 | 6.03 | 2.89-NA | 0.995 |
| HOXA7 Plasma and Urine | 1.50 | 4.88-NA | 0.994 | 1.17 | 1.32-NA | 0.993 |
| HOXA9 Plasma and Urine | 4.54 | 8.4- NA | 0.992 | 1.65 | 1.39-NA | 0.994 |
| SOX17 Plasma and Urine | 6.35 | 1.42-45.27 | 0.028 | 6.40 | 1.11-57.12 | 0.050 |
| ZFP42 Plasma and Urine | 0.58 | 0.03-4.00 | 0.636 | 0.87 | 0.04-7.69 | 0.911 |
| At least 3 genes in Plasma and Urine | 2.66 | 6.97- NA | 0.992 | 0.87 | 0.04-7.69 | 0.911 |
|  |  |  |  |  |  |  |

*Abbreviations*: CI confidence Interval; OR Odds Ratio; NA non-applicable

Multivariate analysis adjusted by age and pack years
